# Supplementary material for: Outpatient Mental Health Services in Mozambique: Use and Treatments
Source: Atypon-hosted journal article supplement (doi:10.1176/appi.ps.201500508), 2016-02-01
Supplement: appi.ps.201500508.ds001.pdf [file appi.ps.201500508.ds001.pdf]

Supplementary table 1. Demographic characteristics of 2,071 patients seeking care from outpatient psychiatric services at Beira Central Hospital from January 2012 – September 2014.

| <b>Characteristic</b>  | <b>N (%) unless noted</b> |
|------------------------|---------------------------|
| <b>Age [mean (SD)]</b> | <b>34.7 (13.1)</b>        |
| <18                    | 52 (2.5)                  |
| 18-25                  | 437 (21.1)                |
| 26-35                  | 773 (37.3)                |
| 36-45                  | 370 (17.9)                |
| 46-55                  | 205 (9.9)                 |
| 56+                    | 163 (7.9)                 |
| Missing                | 71 (3.4)                  |
| <b>Gender</b>          |                           |
| Female                 | 949 (45.8)                |
| Male                   | 974 (47.0)                |
| Missing                | 148 (7.2)                 |
| <b>Visit number</b>    |                           |
| 1                      | 276 (13.3)                |
| 2+                     | 1,575 (76.1)              |
| Missing                | 220 (10.6)                |

Supplementary table 2. ICD-10 classification, age, gender, and first-visit percentage of 2,071 patients seeking care from outpatient psychiatric services at Beira Central Hospital from January 2012 – September 2014.

| Characteristic                                                                 | N (%)<br>unless<br>noted | Mean age<br>(SD) | Age<br>p-value | Percent<br>female | Gender<br>p-value | % first<br>visits | First-visit<br>p-value |
|--------------------------------------------------------------------------------|--------------------------|------------------|----------------|-------------------|-------------------|-------------------|------------------------|
| <b>ICD-10 Diagnosis Code</b>                                                   |                          |                  |                |                   |                   |                   |                        |
| F00-09: Organic, including symptomatic, mental disorders                       | 192 (9.3)                | 41.9 (18.7)      | <0.001         | 59.3              | 0.005             | 22.3              | 0.004                  |
| F10-19: Mental and behavioral disorders due to psychoactive substance use      | 92 (4.4)                 | 33.3 (11.1)      | 0.32           | 10.1              | <0.001            | 26.5              | 0.002                  |
| F20-29: Schizophrenia, schizotypal, and delusional disorders                   | 894 (43.2)               | 34.4 (11.2)      | 0.50           | 51.7              | 0.07              | 6.1               | <0.001                 |
| F30-39: Mood (affective) disorders                                             | 40 (1.9)                 | 38.6 (13.1)      | 0.05           | 84.2              | <0.001            | 20.0              | 0.39                   |
| F40-48: Neurotic, stress-related, and somatoform disorders                     | 97 (4.7)                 | 35.6 (10.9)      | 0.44           | 69.3              | <0.001            | 25.6              | 0.005                  |
| F50-59: Behavioral syndromes associated with physiological or physical factors | 23 (1.1)                 | 35.4 (12.4)      | 0.78           | 23.8              | 0.019             | 50.0              | <0.001                 |
| F60-69: Disorders of adult personality and behavior                            | 7 (0.34)                 | 30.8 (6.4)       | 0.49           | 50.0              | 1.0               | 0.0               | 1.0                    |
| F70-79: Intellectual disability                                                | 40 (1.9)                 | 27.4 (9.9)       | <0.001         | 57.5              | 0.23              | 21.6              | 0.25                   |
| F80-89: Disorders of psychological development                                 | 0 (0)                    | n/a              | n/a            | n/a               | n/a               | n/a               | n/a                    |
| F99-98: Behavioral and emotional disorders with youth onset                    | 2 (0.10)                 | 35 (46.7)        | 0.97           | 50.0              | 1.0               | 0.0               | 1.0                    |
| G40-41: Epilepsy and recurrent seizures                                        | 262 (12.7)               | 30.6 (12.4)      | <0.001         | 40.5              | 0.004             | 11.8              | 0.15                   |
| Missing                                                                        | 422 (20.4)               | 34.8 (13.6)      | 0.73           | 46.4              | 0.20              | 24.2              | <0.001                 |

Supplementary table 3. Four most common narrative primary diagnoses by ICD-10 code along with age, gender, first-visit percentage, and common treatments provided for 2,071 patients seeking care from outpatient psychiatric services at Beira Central Hospital from January 2012 – September 2014.

| ICD-10 code<br>(total n of 1,654 with complete ICD-10)                         | Four† most common primary narrative diagnoses | N (%) of total in each ICD-10 category | Mean age (SD)       | Percent female | % first visit | Most common treatment regimen (n, %) <sup>§</sup>                                                                             |
|--------------------------------------------------------------------------------|-----------------------------------------------|----------------------------------------|---------------------|----------------|---------------|-------------------------------------------------------------------------------------------------------------------------------|
| F00-09: Organic, including symptomatic, mental disorders (192)                 | 1. Organic behavioral disorder - unspecified  | 45 (23.4)                              | 38.3 (16.3)         | 53.7           | 14.6          | Trifluoperazine + biperiden (10, 22.2)<br>Trifluoperazine + promethazine (6, 13.3)<br>Chlorpromazine + promethazine (6, 13.3) |
|                                                                                | 2. Organic behavioral disorder – HIV          | 31 (16.2)                              | 36.7 (12.1)         | <b>70.0*</b>   | 10.3          | Fluphenazine + promethazine (6, 19.4)<br>Trifluoperazine + promethazine (2, 9.1)<br>Trifluoperazine (2, 9.1)                  |
|                                                                                | 3. Organic psychosis                          | 22 (11.5)                              | 37.4 (15.1)         | 59.1           | <b>33.3*</b>  | Haloperidol + promethazine (5, 22.7)<br>Trifluoperazine + promethazine (2, 9.1)                                               |
|                                                                                | 4. Dementia                                   | 19 (9.9)                               | <b>68.0† (13.1)</b> | 64.7           | <b>37.5*</b>  | Chlorpromazine + promethazine (4, 21.1)<br>Chlorpromazine (4, 21.1)                                                           |
| F10-19: Mental and behavioral disorders due to psychoactive substance use (92) | 1. Behavioral disorder due to alcohol         | 22 (23.9)                              | <b>40.4* (10.8)</b> | <b>13.6†</b>   | 22.2          | Chlorpromazine + promethazine (3, 13.6)                                                                                       |
|                                                                                | 2. Behavioral disorder due to multiple drugs  | 22 (23.9)                              | <b>27.5* (7.6)</b>  | <b>9.5†</b>    | <b>10.0†</b>  | Fluphenazine + promethazine (5, 22.7)<br>Chlorpromazine + promethazine (3, 13.6)<br>Haloperidol + promethazine (3, 13.6)      |
|                                                                                | 3. Alcohol dependence                         | 18 (18.6)                              | 37.6 (12.2)         | <b>5.6†</b>    | <b>44.4†</b>  | None (7, 38.9)<br>Chlorpromazine (2, 11.1)                                                                                    |
|                                                                                | 4. Substance dependence                       | 10 (10.9)                              | 31.6 (7.4)          | 25.0           | 12.5          | Chlorpromazine + promethazine (2, 20.0)                                                                                       |

|                                                                    |                        |            |                     |              |              |                                                                                                                |
|--------------------------------------------------------------------|------------------------|------------|---------------------|--------------|--------------|----------------------------------------------------------------------------------------------------------------|
| F20-29: Schizophrenia, schizotypal, and delusional disorders (894) | 1. Schizophrenia       | 617 (69.0) | 34.4 (10.6)         | 52.9         | <b>3.3†</b>  | Decanoate of fluphenazine + promethazine (131, 21.2)<br>Trifluoperazine + promethazine (62, 10.1)              |
|                                                                    | 2. Delirium            | 114 (12.8) | 35.2 (12.0)         | 50.5         | 10.5         | Fluphenazine + promethazine (25, 21.9)<br>Chlorpromazine + promethazine (20, 17.5)                             |
|                                                                    | 3. Persistent delirium | 40 (4.5)   | 38.4 (14.1)         | 46.2         | 10.8         | Trifluoperazine (8, 20.0)<br>Trifluoperazine + promethazine (5, 12.5)<br>Fluphenazine + promethazine (5, 12.5) |
|                                                                    | 4. Chronic psychosis   | 22 (2.5)   | 34.8 (11.8)         | 50.0         | 0.0          | Haloperidol + promethazine (7, 31.8)                                                                           |
| F30-39: Mood (affective) disorders (40)                            | 1. Depressive episode  | 15 (37.5)  | <b>44.5* (15.3)</b> | <b>86.7*</b> | 23.1         | Imipramine (3, 20.0)<br>Amitriptyline (3, 20.0)                                                                |
|                                                                    | 2. Depression          | 13 (32.5)  | 39.3 (9.4)          | 81.8         | 27.3         | Amitriptyline (6, 46.2)<br>Fluoxetine (3, 23.1)                                                                |
|                                                                    | 3. Bipolar             | 5 (12.5)   | 32.8 (4.4)          | 100.0        | 0.0          | Risperidone + carbamazepine (2, 40)                                                                            |
| F40-48: Neurotic, stress-related, and somatoform disorders (97)    | 1. Adjustment disorder | 19 (19.6)  | 40.2 (7.9)          | 73.3         | <b>33.3*</b> | Amitriptyline (4, 21.1)<br>Imipramine (3, 15.8)                                                                |
|                                                                    | 2. Neurotic disorder   | 14 (14.4)  | 34.1 (9.5)          | 46.2         | <b>30.8*</b> | Amitriptyline (4, 28.6)<br>Fluoxetine (4, 28.6)                                                                |
|                                                                    | 3. Somatic disorder    | 13 (13.4)  | 35.2 (9.5)          | 46.2         | <b>36.4*</b> | Amitriptyline (4, 30.8)                                                                                        |
|                                                                    | 4. Anxiety             | 8 (8.3)    | 34.6 (9.5)          | 85.7         | 37.5         | Amitriptyline (4, 50.0)<br>Imipramine (2, 25.0)                                                                |
| F50-59: Behavioral syndromes                                       | 1. Insomnia            | 9 (39.1)   | 33.2 (15.0)         | 22.2         | 33.3         | Flunitrazepam (3, 33.3)                                                                                        |

|                                                                 |                                   |           |                     |              |               |                                                               |
|-----------------------------------------------------------------|-----------------------------------|-----------|---------------------|--------------|---------------|---------------------------------------------------------------|
| associated with physiological or physical factors (23)          |                                   |           |                     |              |               | Bromazepam (2, 22.2)                                          |
|                                                                 | 2. Sexual dysfunction             | 4 (17.4)  | 42.8 (9.6)          | 0.0          | <b>100.0†</b> |                                                               |
|                                                                 | 3. Organic insomnia               | 4 (17.4)  | 38.3 (17.6)         | 66.7         | 25.0          | Flunitrazepam (2, 50.0)                                       |
|                                                                 | 4. Non-organic insomnia           | 4 (17.4)  | 34 (6.1)            | 33.3         | 50.0          |                                                               |
| F60-69: Disorders of adult personality and behavior (7)         | 1. Personality disorder - general | 5 (62.5)  | 31.3 (6.6)          | 60.0         | 0.0           |                                                               |
|                                                                 | 2. Schizoid personality disorder  | 2 (25.0)  | 30 (8.5)            | 0.0          | 100.0         |                                                               |
| F70-79: Intellectual disability (40)                            | 1. Intellectual disability        | 40 (100)  | <b>27.4† (9.9)</b>  | 59.0         | 21.6          | Haloperidol (8, 20.0)<br>Haloperidol + promethazine (6, 15.0) |
| F80-89: Disorders of psychological development (0)              | n/a                               | n/a       | n/a                 | n/a          | n/a           | n/a                                                           |
| F99-98: Behavioral and emotional disorders with youth onset (2) | 1. Motor hyperactivity            | 1 (50)    | 2 (n/a)             | 100.0        | missing       | Carbamazepine (1, 100.0)                                      |
|                                                                 | 2. Tardive dyskinesia             | 1 (50)    | 68 (n/a)            | 0.0          | 0.0           | Promethazine (1, 100.0)                                       |
| G40-41: Epilepsy and recurrent seizures (264)                   | 1. Epilepsy                       | 262 (100) | <b>30.6† (12.4)</b> | <b>40.5*</b> | 11.8          | Carbamazepine (167, 63.7)<br>Phenobarbital (34, 13.0)         |

\* p < 0.05

† p < 0.001

‡ Less than four most common narrative diagnoses are listed because there was no other majority diagnosis after those listed.

§ Top two most common treatment regimens are listed, unless a tie for second. In this case, three are listed. If a three way tie for 2<sup>nd</sup> most common treatment regimen, then only one is listed. If no majority, no treatment is listed. All medications listed are included in the essential medication list with the exception of risperidone
